# Supplementary material
Source: publisher figshare collection journal article supplement (https://tandf.figshare.com/ndownloader/files/21478869)
Supplement: Supplementary file 1 [file 21478869]

Supplementary Table for ‘Middle Miocene palynoflora from the Adamów lignite deposit, central Poland’

Elżbieta Worobiec, Marek Widera, Grzegorz Worobiec, Barbara Kurdziel

Supplementary Table 1. The mean annual temperature (MAT) reconstruction based on the Coexistence Approach (CA) method (Utescher et al. 2014). The nearest living relatives and their MAT ranges follow The Palaeoflora Database (Utescher & Mosbrugger 2015).

| **Fossil taxa** | **Nearest Living Relatives** | **MAT range [oC]** |
| --- | --- | --- |
| *Cathayapollis* spp. | *Cathaya* sp. | 13.4–18.0 |
| *Inaperturopollenites* sp. | *Taxodium*  *Glyptostrobus* | 13.3–25.0  9.1–25.0 |
| *Piceapollis* sp. | *Picea* sp. | -8.9–21.7 |
| *Zonalapollenites* spp. | *Tsuga* sp. | -5.0–21.9 |
| *Aceripollenites* spp. | *Acer* sp. | -1.1–24.0 |
| *Alnipollenites verus* | *Alnus* sp. | -13.3–27.4 |
| *Carpinipites carpinoides* | *Carpinus* sp. | 0.0–25.8 |
| *Caryapollenites simplex* | *Carya* sp. | 4.4–26.6 |
| *Celtipollenites* sp. | *Celtis* sp. | 2.5–25.8 |
| *Cornaceaepollis satzveyensis* | *Mastixia* sp. | 15.7–27.8 |
| *Cornaceaepollis* sp. | *Cornus* sp. | -12–23.1 |
| *Corylopsispollenites microreticulatus* | *Corylopsis* sp. | 9.1–25.5 |
| *Cyrillaceaepollenites* spp. | *Cyrilla*  *Clethra* | 13.6–23.9  7.4–27.7 |
| *Eucommiapollis minor* | *Eucommia ulmoides* | 10.6–21.3 |
| *Faguspollenites* spp. | *Fagus* sp. | 4.4–23.1 |
| *Fraxinipollis* spp. | *Fraxinus* sp. | 0.0–24.0 |
| *Ilexpollenites* spp. | *Ilex* sp. | -0.4–27.7 |
| *Iteapollis angustiporatus* | *Itea* sp. | 7.7–27.7 |
| *Juglanspollenites verus* | *Juglans* sp. | 0.0–27.5 |
| *Myricipites* sp. | *Myrica* sp. | -8.9–28.1 |
| *Nyssapollenites* sp. | *Nyssa* sp. | 4.4–23.9 |
| *Nyssoidites rodderensis* | *Nyssa* sp. | 4.4–23.9 |
| *Periporopollenites stigmosus* | *Liquidambar* sp. | 11.5–25.5 |
| *Polyatriopollenites stellatus* | Pterocarya sp. | 3.9–24.2 |
| *Quercoidites henricii* | *Quercus* (evergreen) | 8.7–22.1 |
| *Quercopollenites* spp. | *Quercus* (deciduous) | -1.4–27.0 |
| *Salixipollenites* sp. | *Salix* sp. | -17.0–27.7 |
| *Spinulaepollis arceuthobioides* | *Arceuthobium* sp. | -5.5–27.7 |
| *Symplocoipollenites vestibulum* | *Symplocos* sp. | 4.5–27.7 |
| *Tricolporopollenites mangiferoides* | *Mangifera* sp. | 15.7–28.1 |
| *Trivestibulopollenites betuloides* | *Betula* sp. | -15.0–25.8 |
| *Ulmipollenites undulosus* | *Ulmus* sp. | -4.9–26.6 |
| *Vitispollenites tener* | *Vitis* sp. | 0.0–27.4 |
| *Zelkovaepollenites* spp. | *Zelkova* sp. | 6.2 - 21.9 |

Coexistence interval: 15.7–18.0 oC

Bordering taxa: 15.7–27.8 oC – *Cornaceaepollis satzveyensis*

15.7–28.1 oC – *Tricolporopollenites mangiferoides*

13.4–18.0 oC – *Cathayapollis* spp.

no outliers
